# Supplementary material for: An anti-inflammatory chondroitin sulfate-poly(lactic-co-glycolic acid) composite electrospinning membrane for postoperative abdominal adhesion prevention
Source: Royal Society of Chemistry journal article supplement (doi:10.1039/d3bm00786c), 2023-01-01
Supplement: d3bm00786c1.pdf [file d3bm00786c1.pdf]

## **Anti-inflammatory chondroitin sulfate-poly(lactic-co-glycolic acid) composite electrospinning membrane for postoperative abdominal adhesion prevention**

Rui Gao<sup>1a</sup>, Fenghui Li<sup>1b</sup>, Yushan Zhang<sup>a</sup>, Pengxu Kong<sup>c, d</sup>, Yu Gao<sup>a</sup>, Jingrong Wang<sup>a</sup>,  
Xiang Liu<sup>a</sup>, Shuangyang Li<sup>a</sup>, Liqin Jiang<sup>\*a</sup>, Ju Zhang<sup>a</sup>, Chuangnian Zhang<sup>a, d</sup>, Zujian  
Feng<sup>\*a</sup>, Pingsheng Huang<sup>a, d</sup>, Weiwei Wang<sup>\*a, d</sup>

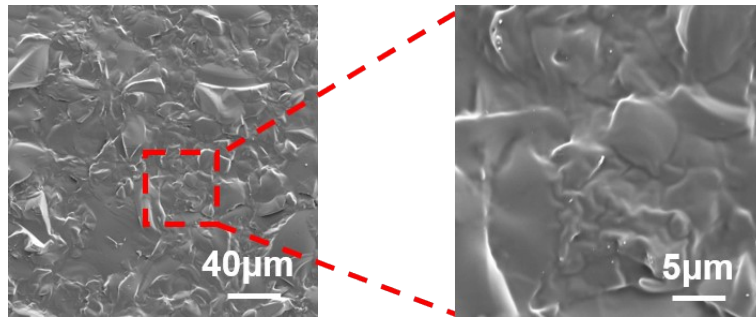

**Figure S1.** Surface morphology of commercial film.

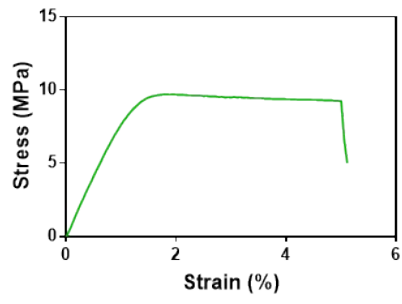

**Figure S2.** Representative stress–strain curve of commercial film.

**Table S1.** The mechanical properties of commercial film.

|                        | Commercial film             |
|------------------------|-----------------------------|
| Young's modulus        | $827.3 \pm 25.27$ MPa       |
| maximum tensile stress | $9.64 \pm 0.68$ MPa         |
| Maximum load           | $3.86 \pm 0.27$ N           |
| Strain at break        | $5.91 \pm 1.08$ %           |
| Water contact angle    | $78.3^\circ \pm 9.01^\circ$ |

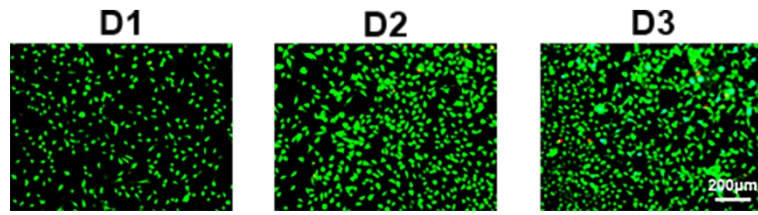

**Figure S3.** Live/dead staining of commercial film for 1, 2, and 3 days.

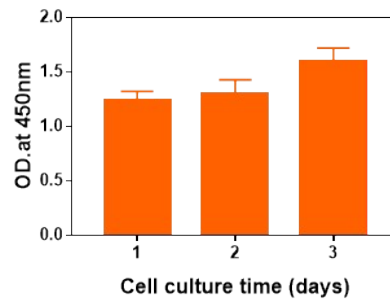

**Figure S4.** The cytotoxicity of commercial film was evaluated by CCK-8 assay for 1, 2, and 3 days. Data presented as mean  $\pm$  SD (n = 5).

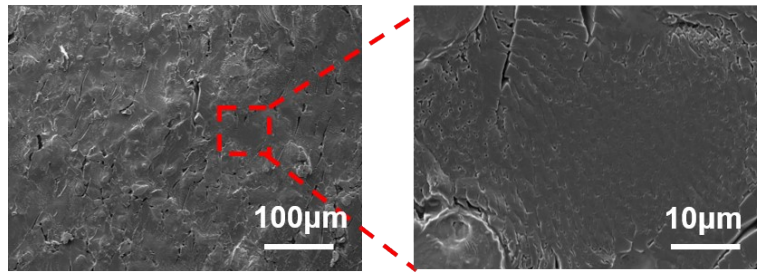

**Figure S5.** Bioelectron microscopy of cells on commercial film.

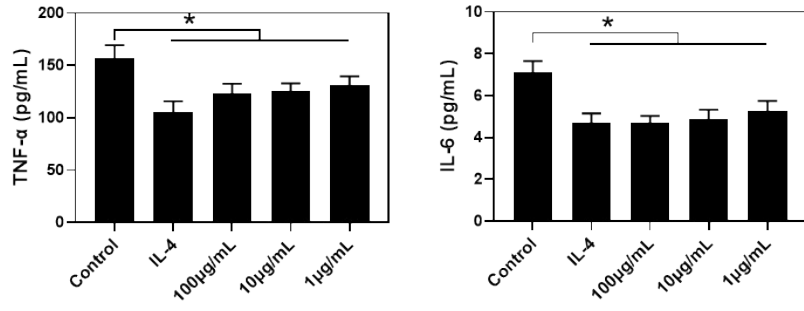

**Figure S6.** Expression levels of TNF- $\alpha$  and IL-6 derived from BMDM stimulated by CS with gradient concentration. Data presented as mean  $\pm$  SD (n = 3).



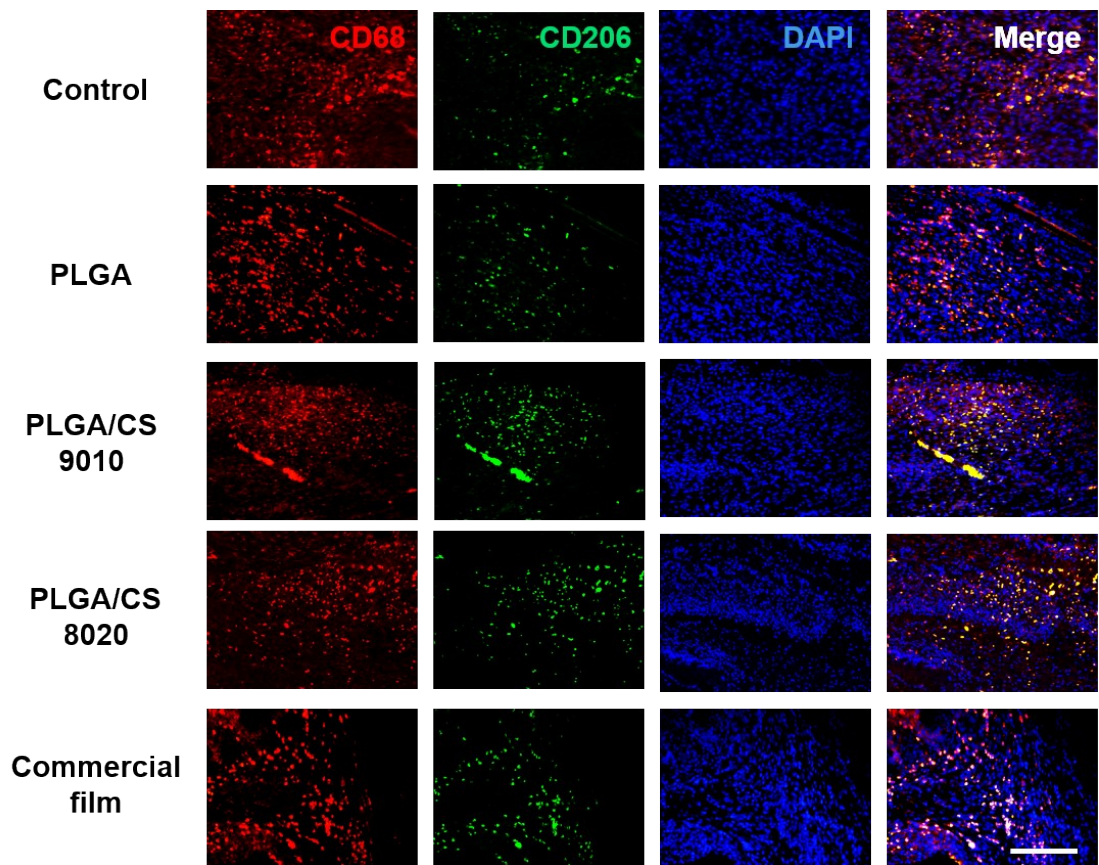

**Figure S7.** Representative immunofluorescence staining images of CD68/CD206 on 21 post surgery. Scar bar, 100  $\mu$ m.
